# Supplementary material for: Dual roles of pear EARLY FLOWERING 4 -like genes in regulating flowering and leaf senescence
Source: PubMed Central journal article supplement — BMC Plant Biol. 2024 Nov 25;24:1117. doi: 10.1186/s12870-024-05850-7 (PMC11587779; doi:10.1186/s12870-024-05850-7), 2024-11-25
Supplement: 12870_2024_5850_MOESM1_ESM.pdf [file 12870_2024_5850_MOESM1_ESM.pdf]

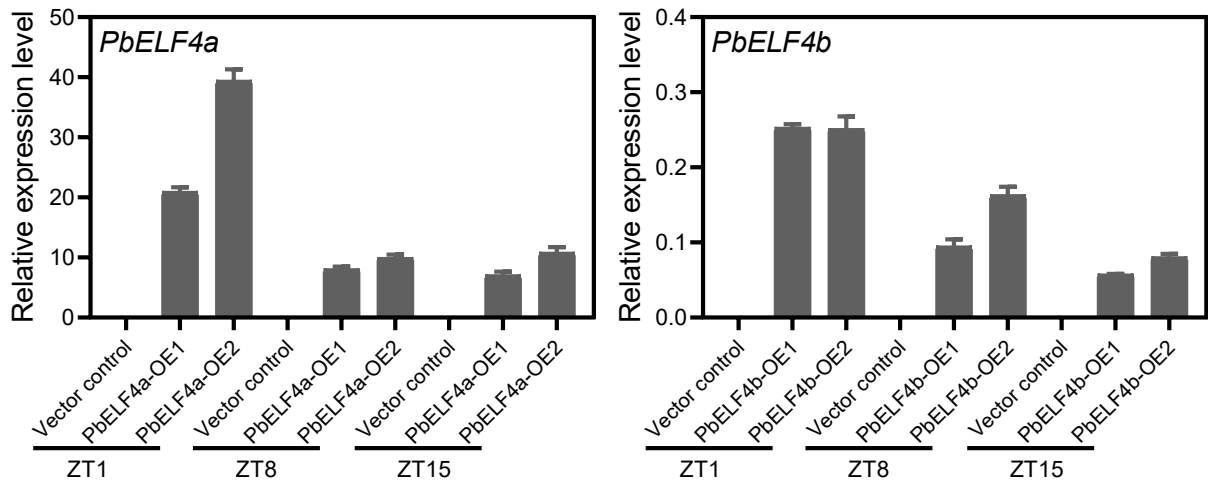

Fig. S1 Quantitative RT-PCR analysis of *PbELF4a* and *PbELF4b* expression in 10-day-old seedlings from control plants and transgenic lines. *AtACT* served as the internal control for gene expression analysis. Data are presented as means  $\pm$  SD (n = 3). The sampling times were ZT1, ZT8, and ZT15.

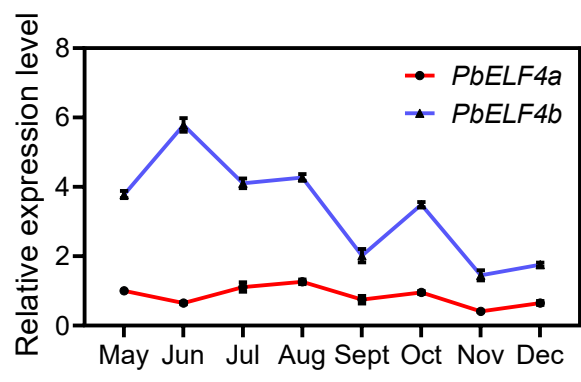

Fig. S2 Dynamic expression patterns of *PbELF4a* and *PbELF4b* during pear leaves development. The expression of *PbELF4a* in sample May was set to "1." *PbUBQ* was used as an internal control. Data are presented as means  $\pm$  SD (n = 3).
